# Supplementary material for: Star-shaped tetrathiafulvalene oligomers towards the construction of conducting supramolecular assembly
Source: publisher site journal article supplement (doi:10.3762/bjoc.11.175), 2015-09-10
Supplement: Additional file 1 [file 1860-5397-11-175-S1.pdf]

## Supporting Information

for

# Star-shaped tetrathiafulvalene oligomers towards the construction of conducting supramolecular assembly

Masahiko Iyoda<sup>1\*</sup> and Masashi Hasegawa<sup>2</sup>

Address: <sup>1</sup>Department of Chemistry, Graduate School of Science and Engineering, Tokyo Metropolitan University, Hachioji, Tokyo 192-0397, Japan and <sup>2</sup>Department of Chemistry, School of Science, Kitasato University, 1-15-1 Kitasato, Minami-ku, Sagamihara, Kanagawa 252-0373, Japan

Email: MasahikoIyoda - iyoda@tmu.ac.jp

\*Corresponding author

## Determination of association constants ( $K_2$ ) of **23** by NMR and cyclic voltammetry analysis of **23**

### Contents

|                                                                                                                                                |    |
|------------------------------------------------------------------------------------------------------------------------------------------------|----|
| S1. Determination of association constant by NMR technique                                                                                     | S2 |
| S2. Chemical shifts of H <sub>a</sub> and association constants ( $K_2$ ) of <b>23</b> in CDCl <sub>3</sub> (Table S1)                         | S3 |
| S3. Chemical shifts of H <sub>a</sub> and association constants ( $K_2$ ) of <b>23</b> in CDCl <sub>3</sub> –CD <sub>3</sub> CN 3:7 (Table S2) | S4 |
| S4. Cyclic voltammetry analysis of <b>23</b> in dilute and concentrated CH <sub>2</sub> Cl <sub>2</sub> solutions                              | S5 |

## S1. Determination of association constant by NMR technique

The association constant of **23** was determined by  $^1\text{H}$  NMR titration experiments. As mentioned in the text, the protons at the central benzene ring clearly shifted to higher field with increasing concentration. Thus, the central  $\text{H}_a$  (Scheme S1) varied from  $\delta$  7.478 to 7.457 as the concentration changed from 0.48 to 48.3 mM in  $\text{CDCl}_3$  at 293 K. On the contrary, the chemical shift of  $\text{H}_a$  in 14.3 mM of **23** varied from  $\delta$  7.464 to 7.484 downfield as the temperature changed from 40 to  $-20^\circ\text{C}$ .

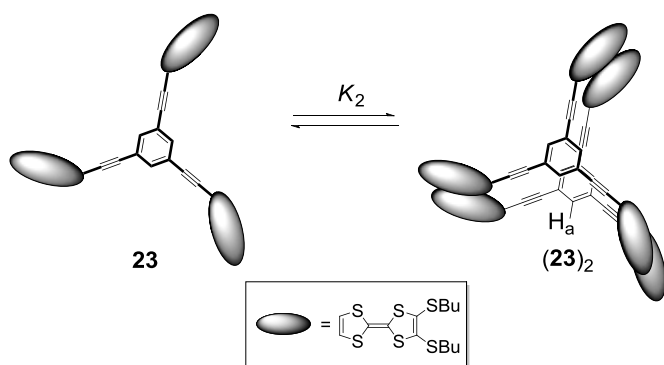

**Scheme S1:** Self-association of **23**

The association constants ( $K_2$ ) of **23** were determined by assuming that monomer–dimer equilibrium is the predominant process. The chemical shifts of **23** were plotted against the concentrations and the data were treated by least-square curve-fitting to eq. 2, to determine  $K_2$ ,  $\delta_m$ , and  $\delta_d$ , where  $\delta_m$  and  $\delta_d$  are chemical shifts of the monomer and dimer, and  $C$  is the total stoichiometric concentration.

$$K_2 = \frac{[(23)_2]}{[23]^2} \quad \text{eq. 1}$$

$$\delta = \delta_m + (\delta_d - \delta_m) \left( 1 + \frac{1 - \sqrt{8K_2C + 1}}{4K_2C} \right) \quad \text{eq. 2}$$

The chemical shifts of the  $\text{H}_a$  proton, which show reasonable concentration and temperature dependence, were applied to the equations. The dilution curve and plotted points are shown in Figures S1 and S2, and the calculated parameters,  $K_2$ ,  $\delta_m$ , and  $\delta_d$ , are summarized in Tables 1 and 2.

## S2. Chemical shifts of H<sub>a</sub> and association constants (*K*<sub>2</sub>) of **23** in CDCl<sub>3</sub>.

**Table S1:** Chemical shifts of H<sub>a</sub> and calculated  $\delta_d$ ,  $\delta_m$ , and *K*<sub>2</sub> in CDCl<sub>3</sub>.

| Conc                  | −10 °C           | 0 °C              | 10 °C             | 20 °C            | 30 °C            | 40 °C            |
|-----------------------|------------------|-------------------|-------------------|------------------|------------------|------------------|
| 48.3                  | 7.4616           | 7.4604            | 7.4586            | 7.4567           | 7.4543           | 7.4518           |
| 32.2                  | 7.4695           | 7.4677            | 7.4653            | 7.4634           | 7.4598           | 7.4567           |
| 21.5                  | 7.4769           | 7.4744            | 7.4708            | 7.4677           | 7.4647           | 7.4610           |
| 14.3                  | 7.4811           | 7.4781            | 7.4750            | 7.4714           | 7.4677           | 7.4640           |
| 9.5                   | 7.4848           | 7.4811            | 7.4775            | 7.4738           | 7.4701           | 7.4659           |
| 4.8                   | 7.4884           | 7.4848            | 7.4799            | 7.4762           | 7.4720           | 7.4683           |
| 0.95                  | 7.4921           | 7.4878            | 7.4830            | 7.4787           | 7.4738           | 7.4695           |
| 0.48                  | 7.4921           | -                 | 7.4830            | 7.4781           | 7.4744           | 7.4695           |
| $\delta_d$            | 7.304<br>± 0.026 | 7.2948<br>± 0.033 | 7.291<br>± 0.035  | 7.291<br>± 0.028 | 7.283<br>± 0.051 | 7.278<br>± 0.061 |
| $\delta_m$            | 7.493<br>± 0.000 | 7.488<br>± 0.000  | 7.4835<br>± 0.000 | 7.479<br>± 0.000 | 7.475<br>± 0.000 | 7.470<br>± 0.000 |
| <i>K</i> <sub>2</sub> | 2.46<br>± 0.47   | 2.05<br>± 0.47    | 1.78<br>± 0.43    | 1.58<br>± 0.30   | 1.38<br>± 0.45   | 1.22<br>± 0.47   |

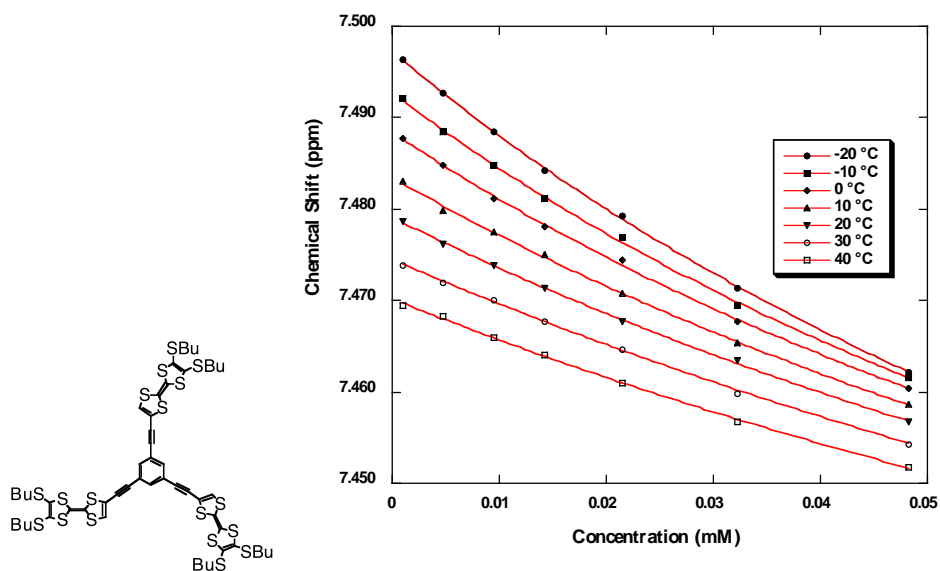

**Figure S1:** Curve fitting for H<sub>a</sub> proton of **23** in CDCl<sub>3</sub> solution.

**S3. Chemical shifts of H<sub>a</sub> and association constants ( $K_2$ ) of **23** in CDCl<sub>3</sub>–CD<sub>3</sub>CN (3:7)**

**Table S2:** Chemical shifts of H<sub>a</sub> and calculated  $\delta_d$ ,  $\delta_m$ , and  $K_2$  in CDCl<sub>3</sub>–CD<sub>3</sub>CN (3:7).

| Conc.<br>(mM) | –30 °C            | –20 °C            | –10 °C            | 0 °C              | 10 °C             | 20 °C             | 30 °C             |
|---------------|-------------------|-------------------|-------------------|-------------------|-------------------|-------------------|-------------------|
| 10.00         | –                 | 7.4161            | 7.4381            | 7.4522            | 7.4626            | 7.4699            | 7.4729            |
| 8.44          | 7.4039            | 7.4320            | 7.4534            | 7.4656            | 7.4717            | 7.4766            | –                 |
| 6.49          | 7.4284            | 7.4510            | 7.4668            | 7.4760            | 7.4821            | 7.4845            | 7.4858            |
| 5.00          | 7.4461            | 7.4656            | 7.4778            | 7.4851            | 7.4888            | 7.4906            | 7.4909            |
| 4.33          | 7.4601            | 7.4760            | 7.4858            | 7.4913            | 7.4937            | 7.4943            | 7.4931            |
| 2.79          | 7.4802            | 7.4937            | 7.4979            | 7.5004            | 7.5004            | 7.5004            | 7.4992            |
| 2.50          | 7.4858            | 7.4968            | 7.5016            | 7.5029            | 7.5047            | 7.5022            | 7.4992            |
| 1.85          | 7.5029            | 7.5084            | 7.5102            | 7.5102            | 7.5084            | 7.5053            | 7.5022            |
| 1.39          | 7.5114            | 7.5145            | 7.5151            | 7.5132            | 7.5108            | 7.5077            | 7.5041            |
| 0.923         | 7.5218            | 7.5212            | 7.5193            | 7.5169            | 7.5139            | 7.5102            | 7.5065            |
| 0.723         | 7.5267            | 7.5248            | 7.5224            | 7.5187            | 7.5151            | 7.5114            | –                 |
| 0.462         | 7.5315            | 7.5285            | 7.5254            | 7.5211            | 7.5169            | 7.5130            | 7.5077            |
| $\delta_d$    | 6.9021<br>± 0.075 | 6.9137<br>± 0.062 | 6.9238<br>± 0.107 | 6.9599<br>± 0.179 | 6.9743<br>± 0.154 | 6.9815<br>± 0.089 | 6.9846<br>± 0.208 |
| $\delta_m$    | 7.5445<br>± 0.002 | 7.5370<br>± 0.001 | 7.5310<br>± 0.001 | 7.5253<br>± 0.001 | 7.5203<br>± 0.001 | 7.5151<br>± 0.000 | 7.5100<br>± 0.000 |
| $K_2$         | 21.1<br>± 3.85    | 14.5<br>± 2.10    | 10.4<br>± 2.46    | 7.98<br>± 3.24    | 6.40<br>± 2.21    | 5.01<br>± 0.98    | 4.04<br>± 1.84    |

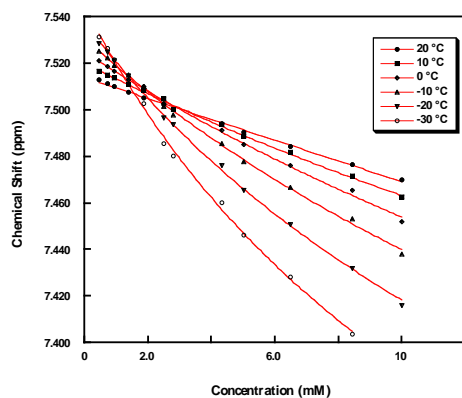

**Figure S2:** Curve fitting for H<sub>a</sub> proton of **23** in CD<sub>3</sub>CN–CDCl<sub>3</sub> solution.

### S3. Cyclic voltammetry analysis of **23** in dilute and concentrated CH<sub>2</sub>Cl<sub>2</sub> solutions.

The redox potentials of **23** were measured by cyclic voltammetry using 0.1 M *n*-Bu<sub>4</sub>NClO<sub>4</sub>, Pt as working electrode, Ag/Ag<sup>+</sup> as reference electrode, and Pt wire as counter electrode at 100 mV/sec. Potentials were referred to Fc/Fc<sup>+</sup>. As shown in Figure S2, CV analysis of **23** in a dilute CH<sub>2</sub>Cl<sub>2</sub> solution ( $1.9 \times 10^{-5}$  M) showed two three-electron redox waves at 0.05 and 0.40 V vs Fc/Fc<sup>+</sup> corresponding to the formation of **23**<sup>3+</sup> and **23**<sup>6+</sup>, whereas a similar CV analysis of **23** in a concentrated CH<sub>2</sub>Cl<sub>2</sub> solution ( $1.2 \times 10^{-3}$  M) displayed three reversible waves at -0.04, 0.14, and 0.47 V vs Fc/Fc<sup>+</sup> corresponding to the formation of (**23**)<sub>2</sub><sup>3+</sup>, (**23**)<sub>2</sub><sup>6+</sup>, and (**23**)<sub>2</sub><sup>12+</sup>.

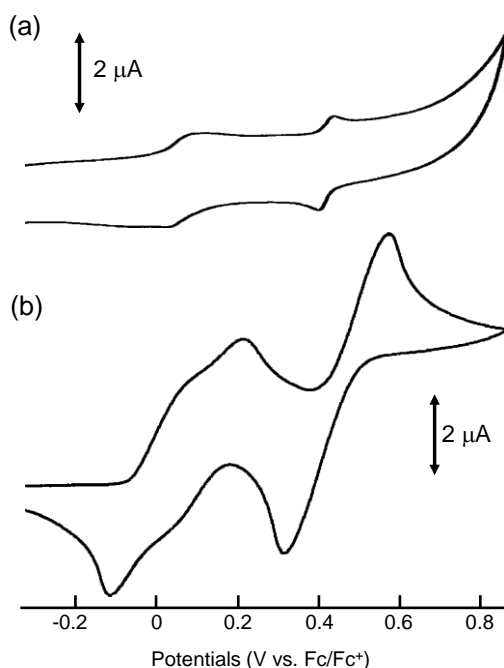

**Figure S2:** Cyclic voltammograms of **23**. (a) Dilute ( $c = 1.9 \times 10^{-5}$  M) solution in CH<sub>2</sub>Cl<sub>2</sub>. (b) Concentrated ( $c = 1.2 \times 10^{-3}$  M) solution in CH<sub>2</sub>Cl<sub>2</sub>.
